# Supplementary material for: Facile synthesis of scandium fluoride oriented single-crystalline rods and urchin-like structures by a gas–solution interface technique
Source: Royal Society of Chemistry journal article supplement (doi:10.1039/c7ce01396e), 2017-01-01
Supplement: c7ce01396e1.pdf [file c7ce01396e1.pdf]

Electronic Supplementary Material (ESI) for CrystEngComm

## Facile synthesis of Scandium Fluoride oriented single-crystalline rods and urchin-like structures by Gas-Solution Interface Technique

L. B. Gulina,<sup>a\*</sup> V. P. Tolstoy,<sup>a</sup> I. A. Kasatkin<sup>a</sup> and I. V. Murin<sup>a</sup>

<sup>a</sup> Saint-Petersburg State University, 7/9 Universitetskaya nab., St. Petersburg, 199034 Russia.

\* Corresponding author e-mail: [l.gulina@spbu.ru](mailto:l.gulina@spbu.ru); Fax: +7(812)428-6859; Tel: +7(812)428-4104

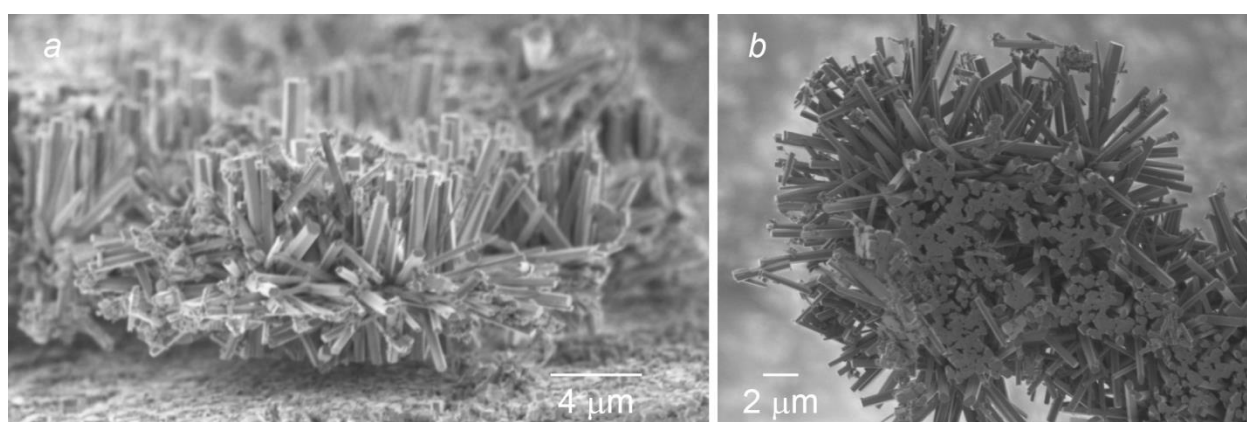

**Figure S1.** SEM images of scandium fluoride rod crystals synthesized from 0.05 M  $\text{ScCl}_3$  solution: *a*) cross view image; *b*) bottom view image

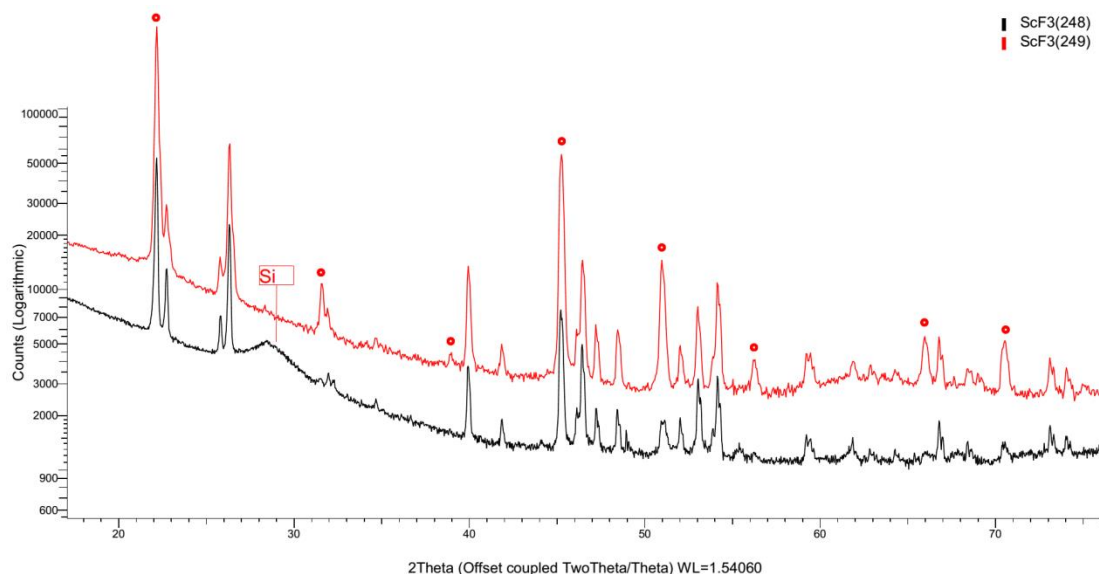

**Figure S2.** XRD patterns of scandium fluoride crystals, synthesized from 0.02 M (black curve) and 0.1 M (red curve) solutions on the silicon surface. The contents of  $\text{ScF}_3$  cubic phase is 10 % and 35 % correspondingly. The peaks of the cubic phase are marked with red circles.

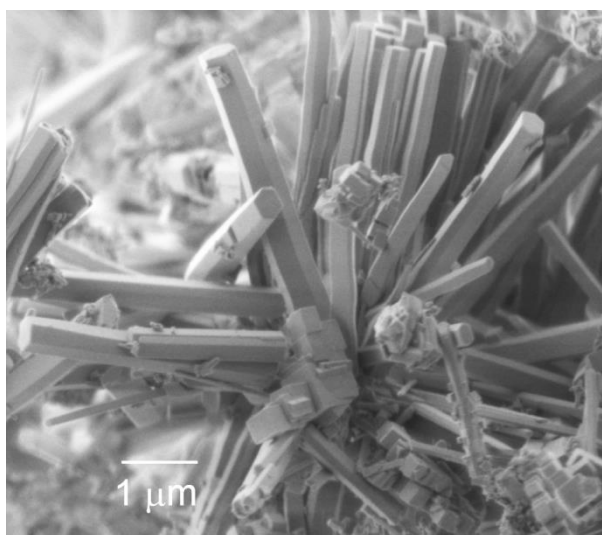

**Figure S3.** SEM images of scandium fluoride rod crystals synthesized from 0.02 M  $\text{ScCl}_3$  solution: agglomeration of cubic and rod crystals is clearly visible.

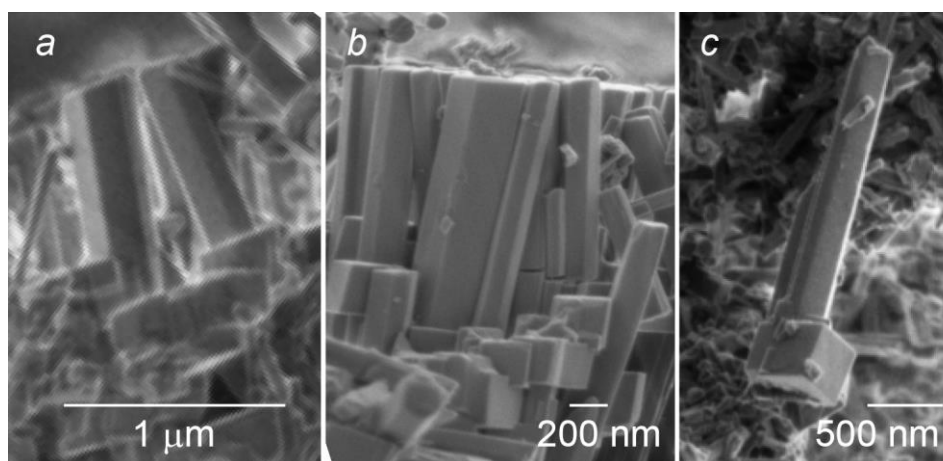

**Figure S4.** SEM images of scandium fluoride rod crystals synthesized from 0.05 M  $\text{ScCl}_3$  solution during 10 min: agglomerations of cubic and rod crystals are clearly visible.
